# Supplementary material
Source: Springer Nature journal article supplement (https://www.springermedizin.de/resource/supplementary/12888_2010_773_MOESM1_ESM.pdf/9478696)
Supplement: MOESM1 [file 9478696]

Baseline  
n=989

1<sup>st</sup> Drop-out sample (n=423)  
Age (yrs)  $40.7 \pm 11.8$   
Males, n=82 (19.4%); Females, n=341 (80.6%)

n=566  
Completers at Visit B

2<sup>nd</sup> Drop-out sample (n=281)  
Age (yrs)  $40.1 \pm 11.2$   
Males, n=70 (24.9%); Females, n=211 (75%)

n=285  
Completers at Visit C

3<sup>rd</sup> Drop-out sample (n=140)  
Age (yrs)  $39.9 \pm 11.1$   
Males, n=28 (20%); Females, n=112 (80%)

n=145  
Completers at Visit D
